# Supplementary material for: Male infertility risk and plasma lipidome: a Mendelian randomization study
Source: Frontiers journal article supplement (doi:10.3389/fendo.2024.1412684), 2024-08-14
Supplement: Table_1.XLS [file Table_1.XLS]

## Sheet: Sheet1
SNP	effect_allele.exposure	other_allele.exposure	effect_allele.outcome	other_allele.outcome	beta.exposure	beta.outcome	eaf.exposure	eaf.outcome	remove	palindromic	ambiguous	id.outcome	se.outcome	pval.outcome	samplesize.outcome	outcome	se.exposure	pval.exposure	samplesize.exposure	exposure	id.exposure
rs10927285	G	C	G	C	0.0823211	-0.0537	0.327092	0.3368	FALSE	TRUE	FALSE	finn-b-N14_MALEINFERT	0.0582	0.3558	100000	Male infertility || id:finn-b-N14_MALEINFERT	0.0175749	2.86212e-06	7174	Sphingomyelin (d40:1) levels	GCST90277376
rs111997200	C	T	C	T	-0.0796657	0.0339	0.500849	0.4992	FALSE	FALSE	FALSE	finn-b-N14_MALEINFERT	0.055	0.5377	100000	Male infertility || id:finn-b-N14_MALEINFERT	0.0167449	1.99348e-06	7174	Sphingomyelin (d40:1) levels	GCST90277376
rs113318071	T	C	T	C	0.16166	-0.1853	0.0632093	0.06029	FALSE	FALSE	FALSE	finn-b-N14_MALEINFERT	0.1164	0.1114	100000	Male infertility || id:finn-b-N14_MALEINFERT	0.0342036	2.32718e-06	7174	Sphingomyelin (d40:1) levels	GCST90277376
rs11591147	T	G	T	G	-0.331697	-0.0527	0.0332154	0.03584	FALSE	FALSE	FALSE	finn-b-N14_MALEINFERT	0.1464	0.718899	100000	Male infertility || id:finn-b-N14_MALEINFERT	0.0464806	1.05208e-12	7174	Sphingomyelin (d40:1) levels	GCST90277376
rs117643293	T	C	T	C	-0.325047	0.2049	0.0619915	0.06383	FALSE	FALSE	FALSE	finn-b-N14_MALEINFERT	0.1119	0.0670595	100000	Male infertility || id:finn-b-N14_MALEINFERT	0.0338607	1.0811e-21	7174	Sphingomyelin (d40:1) levels	GCST90277376
rs118068660	T	C	T	C	-0.143351	-0.1124	0.0946153	0.1014	FALSE	FALSE	FALSE	finn-b-N14_MALEINFERT	0.0901	0.2122	100000	Male infertility || id:finn-b-N14_MALEINFERT	0.0281007	3.45906e-07	7174	Sphingomyelin (d40:1) levels	GCST90277376
rs1800961	T	C	T	C	-0.177985	0.0923	0.0524109	0.04547	FALSE	FALSE	FALSE	finn-b-N14_MALEINFERT	0.1332	0.4883	100000	Male infertility || id:finn-b-N14_MALEINFERT	0.0371697	1.7136e-06	7174	Sphingomyelin (d40:1) levels	GCST90277376
rs182695896	C	A	C	A	0.376534	-0.2145	0.025305	0.0255	FALSE	FALSE	FALSE	finn-b-N14_MALEINFERT	0.1752	0.2209	100000	Male infertility || id:finn-b-N14_MALEINFERT	0.05282	1.11157e-12	7174	Sphingomyelin (d40:1) levels	GCST90277376
rs186039163	G	T	G	T	-0.398759	0.2474	0.010095	0.005876	FALSE	FALSE	FALSE	finn-b-N14_MALEINFERT	0.3732	0.5073	100000	Male infertility || id:finn-b-N14_MALEINFERT	0.0839781	2.08786e-06	7174	Sphingomyelin (d40:1) levels	GCST90277376
rs192913735	T	C	T	C	-0.56209	0.2518	0.00906118	0.006602	FALSE	FALSE	FALSE	finn-b-N14_MALEINFERT	0.3448	0.4652	100000	Male infertility || id:finn-b-N14_MALEINFERT	0.0874219	1.3583e-10	7174	Sphingomyelin (d40:1) levels	GCST90277376
rs2275544	C	T	C	T	-0.122729	-0.1004	0.125147	0.1323	FALSE	FALSE	FALSE	finn-b-N14_MALEINFERT	0.0813	0.2167	100000	Male infertility || id:finn-b-N14_MALEINFERT	0.0251971	1.13439e-06	7174	Sphingomyelin (d40:1) levels	GCST90277376
rs2552134	T	G	T	G	-0.0928061	-0.0929	0.22068	0.229	FALSE	FALSE	FALSE	finn-b-N14_MALEINFERT	0.0655	0.1564	100000	Male infertility || id:finn-b-N14_MALEINFERT	0.0200816	3.87614e-06	7174	Sphingomyelin (d40:1) levels	GCST90277376
rs283819	C	A	C	A	-0.105946	-0.0219	0.815523	0.8119	FALSE	FALSE	FALSE	finn-b-N14_MALEINFERT	0.0713	0.7591	100000	Male infertility || id:finn-b-N14_MALEINFERT	0.0216471	1.00846e-06	7174	Sphingomyelin (d40:1) levels	GCST90277376
rs374071816	A	T	A	T	0.175204	-0.1008	0.057405	0.06185	FALSE	TRUE	FALSE	finn-b-N14_MALEINFERT	0.1147	0.3795	100000	Male infertility || id:finn-b-N14_MALEINFERT	0.0362667	1.38295e-06	7174	Sphingomyelin (d40:1) levels	GCST90277376
rs4949190	T	C	T	C	-0.0985502	-0.0715	0.772666	0.7865	FALSE	FALSE	FALSE	finn-b-N14_MALEINFERT	0.0677	0.2913	100000	Male infertility || id:finn-b-N14_MALEINFERT	0.0199284	7.77979e-07	7174	Sphingomyelin (d40:1) levels	GCST90277376
rs4954960	C	T	C	T	0.090621	0.0609	0.737955	0.7348	FALSE	FALSE	FALSE	finn-b-N14_MALEINFERT	0.063	0.3332	100000	Male infertility || id:finn-b-N14_MALEINFERT	0.0190055	1.89612e-06	7174	Sphingomyelin (d40:1) levels	GCST90277376
rs59596298	C	G	C	G	0.0886943	0.0205	0.474627	0.4889	FALSE	TRUE	TRUE	finn-b-N14_MALEINFERT	0.055	0.7093	100000	Male infertility || id:finn-b-N14_MALEINFERT	0.0167731	1.27105e-07	7174	Sphingomyelin (d40:1) levels	GCST90277376
rs7315519	G	A	G	A	0.0872991	-0.0582	0.665121	0.665	FALSE	FALSE	FALSE	finn-b-N14_MALEINFERT	0.0587	0.3214	100000	Male infertility || id:finn-b-N14_MALEINFERT	0.0175315	6.52405e-07	7174	Sphingomyelin (d40:1) levels	GCST90277376
rs7412	T	C	T	C	-0.200138	0.0649	0.053066	0.05418	FALSE	FALSE	FALSE	finn-b-N14_MALEINFERT	0.1234	0.5988	100000	Male infertility || id:finn-b-N14_MALEINFERT	0.0371474	7.36041e-08	7174	Sphingomyelin (d40:1) levels	GCST90277376
rs75679663	A	C	A	C	-0.774235	0.3775	0.0257881	0.02765	FALSE	FALSE	FALSE	finn-b-N14_MALEINFERT	0.1661	0.0230802	100000	Male infertility || id:finn-b-N14_MALEINFERT	0.0530154	1.26118e-47	7174	Sphingomyelin (d40:1) levels	GCST90277376
rs76174849	T	C	T	C	0.367184	-0.3988	0.0140437	0.01358	FALSE	FALSE	FALSE	finn-b-N14_MALEINFERT	0.2424	0.0999194	100000	Male infertility || id:finn-b-N14_MALEINFERT	0.0719389	3.41117e-07	7174	Sphingomyelin (d40:1) levels	GCST90277376
rs76790474	A	G	A	G	-0.137269	0.0921	0.252665	0.2462	FALSE	FALSE	FALSE	finn-b-N14_MALEINFERT	0.0647	0.1544	100000	Male infertility || id:finn-b-N14_MALEINFERT	0.0194035	1.6378e-12	7174	Sphingomyelin (d40:1) levels	GCST90277376
rs77030061	T	C	T	C	0.224844	-0.0397	0.0375859	0.03436	FALSE	FALSE	FALSE	finn-b-N14_MALEINFERT	0.1539	0.7962	100000	Male infertility || id:finn-b-N14_MALEINFERT	0.0478615	2.6765e-06	7174	Sphingomyelin (d40:1) levels	GCST90277376
rs77645768	A	G	A	G	0.319735	-0.0387	0.0255539	0.02644	FALSE	FALSE	FALSE	finn-b-N14_MALEINFERT	0.1748	0.8249	100000	Male infertility || id:finn-b-N14_MALEINFERT	0.053608	2.56441e-09	7174	Sphingomyelin (d40:1) levels	GCST90277376
rs7970512	A	C	A	C	-0.229072	-0.0202	0.0349783	0.03434	FALSE	FALSE	FALSE	finn-b-N14_MALEINFERT	0.1498	0.8929	100000	Male infertility || id:finn-b-N14_MALEINFERT	0.0477632	1.65061e-06	7174	Sphingomyelin (d40:1) levels	GCST90277376
rs80101718	A	G	A	G	0.334368	0.0514	0.0296183	0.02869	FALSE	FALSE	FALSE	finn-b-N14_MALEINFERT	0.1647	0.754899	100000	Male infertility || id:finn-b-N14_MALEINFERT	0.0508023	4.96605e-11	7174	Sphingomyelin (d40:1) levels	GCST90277376
rs8067235	A	G	A	G	0.0787944	0.058	0.396161	0.3792	FALSE	FALSE	FALSE	finn-b-N14_MALEINFERT	0.0571	0.3095	100000	Male infertility || id:finn-b-N14_MALEINFERT	0.0170925	4.09736e-06	7174	Sphingomyelin (d40:1) levels	GCST90277376
rs8189230	A	G	A	G	0.156337	-0.0159	0.0702372	0.0666	FALSE	FALSE	FALSE	finn-b-N14_MALEINFERT	0.1107	0.8861	100000	Male infertility || id:finn-b-N14_MALEINFERT	0.0338292	3.87645e-06	7174	Sphingomyelin (d40:1) levels	GCST90277376
rs9835223	G	C	G	C	-0.103581	0.1201	0.801158	0.7972	FALSE	TRUE	FALSE	finn-b-N14_MALEINFERT	0.0689	0.0813598	100000	Male infertility || id:finn-b-N14_MALEINFERT	0.0210949	9.29346e-07	7174	Sphingomyelin (d40:1) levels	GCST90277376
